# Supplementary material for: Effects of Different Edible Coatings on the Shelf Life of Fresh Black Mulberry Fruits (Morus nigra L.)
Source: MDPI journal article supplement (doi:10.3390/agriculture12071068), 2022-07-21
Supplement: s1 [file s1]

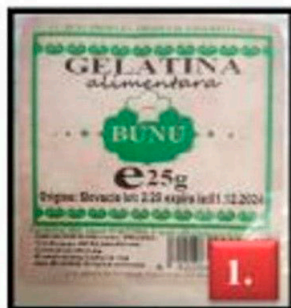

1.

1. GELATINE POWDER

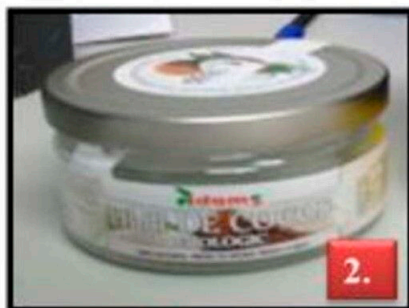

2.

2. COCONUT OIL

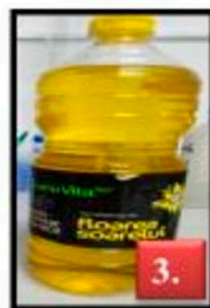

3.

3. SUNFLOWER OIL

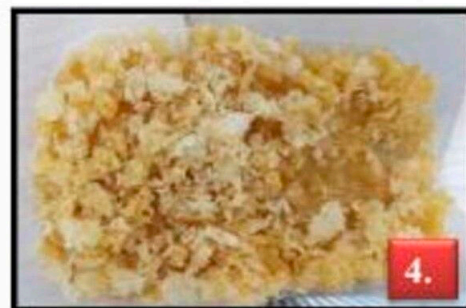

4.

4. BEESWAX

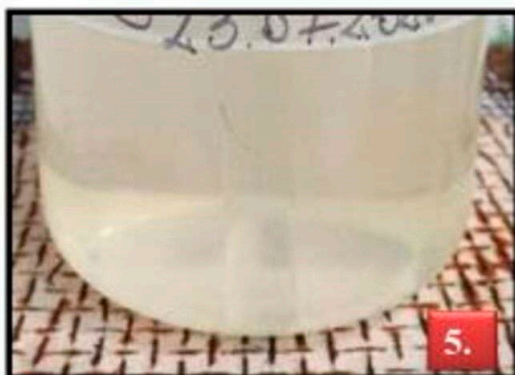

5.

5. G-SOLUTION (1:10)

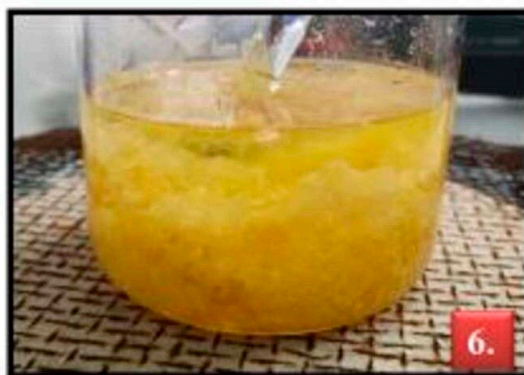

6.

6. O+W BEFORE HOMOGENIZATION

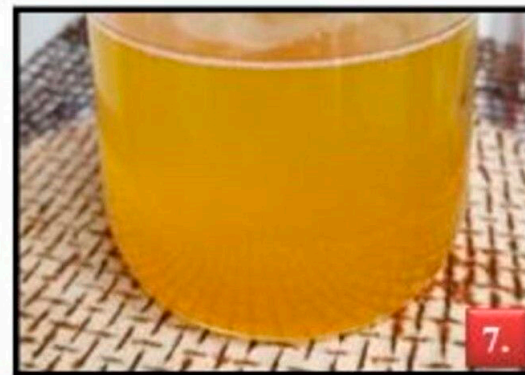

7.

7. O+W AFTER HOMOGENIZATION

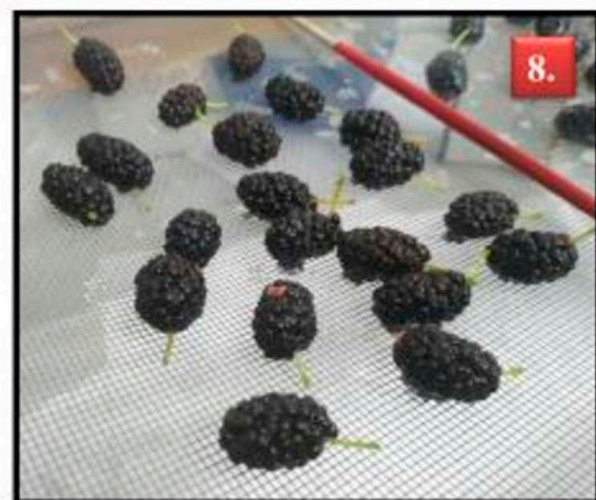

8.

8. G\_MN

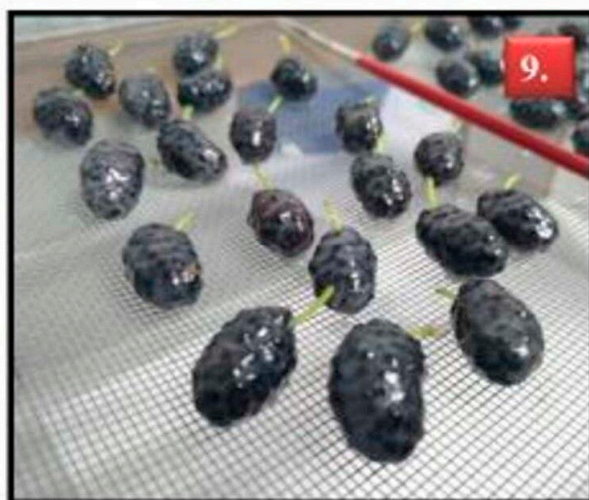

9.

9. O+W\_MN

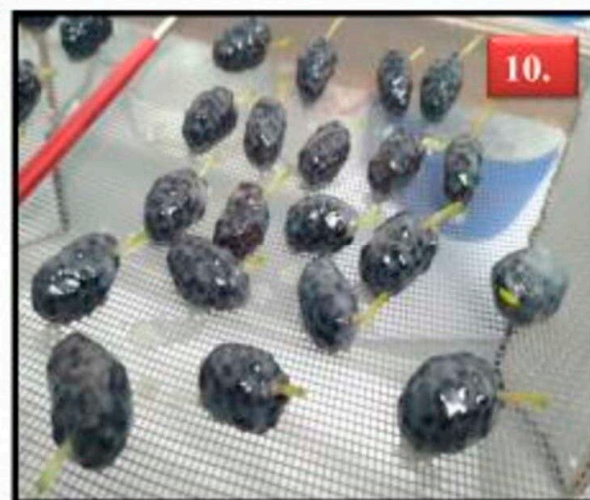

10.

10. O+W\_G\_MN
